# Supplementary material
Source: publisher figshare collection journal article supplement (https://frontiersin.figshare.com/ndownloader/files/32708117)
Supplement: Supplementary file 1 [file 32708117]

Supplementary Material

## Supplementary Figures

##

***Supplementary Figure 1****: Predicted barotropic tidal currents according to the TPXO tidal model during the times of sampling. Shown is the current amplitude in north south and east west direction with time (upper panel), and the direction and amplitude of the tidal ellipse (lower panel).*

## Supplementary Tables

***Supplementary Table 1:*** *Latitude and Longitude, as well as date on which each CTD/TMR at Macauley and Brothers volcano was conducted.*

|  | **CTD/TMR ID** | **Latitude** | **Longitude** | **Date (UTC)** |
| --- | --- | --- | --- | --- |
| Macauley | 004 CTD – T start | 30°12.5620 S | 178°26.0170 W | 26. Dec. 2016 |
| 004 CTD – T end | 30°13.4470 S | 178°29.5800 W | 26. Dec. 2016 |
| 006 CTD - V | 30°12.7850 S | 178°26.9340 W | 26. Dec. 2016 |
| 010 CTD – T start | 30°12.8770 S | 178°26.6140 W | 27. Dec. 2016 |
| 010 CTD – T end | 30°12.0520 S | 178°29.4080 W | 27. Dec. 2016 |
| 012 CTD - V | 30°12.9130 S | 178°27.7150 W | 27. Dec. 2016 |
| 019 CTD - V | 30°12.8540 S | 178°27.1710 W | 29. Dec. 2016 |
| Brothers | 046 CTD – T start | 34°50.9480 S | 179°3.1930 E | 07. Jan. 2017 |
| 046 CTD – T end | 34°54.3840 S | 179°4.8030 E | 07. Jan. 2017 |
| 049 CTD – T start | 34°51.7620 S | 179°5.3930 E | 08. Jan. 2017 |
| 049 CTD – T end | 34°53.9830 S | 179°3.0130 E | 08. Jan. 2017 |
| 053 CTD – V | 34°51.7330 S | 179°3.5590 E | 09. Jan. 2017 |
| 054 CTD – V | 34°52.1650 S | 179°3.7590 E | 09. Jan. 2017 |
| 057 CTD – T start | 34°51.4870 S | 179°1.8810 E | 10. Jan. 2017 |
| 057 CTD – T end | 34°53.5130 S | 179°6.1070 E | 10. Jan. 2017 |
| 058 CTD - V | 34°52.7370 S | 179°4.5030 E | 10. Jan. 2017 |
| 060 TMR | 34° 49.392 S | 179° 2.473 E | 10. Jan. 2017 |
| 062 CTD – T start | 34°50.9260 S | 179°3.0100 E | 11. Jan. 2017 |
| 062 CTD – T end | 34°53.4540 S | 179°3.0230 E | 11. Jan. 2017 |
| 070 TMR | 34°56 793 S | 179°5.926 E | 13. Jan. 2017 |
| 083 TMR | 34°45.9520 S | 179° 0.8700 E | 17. Jan. 2017 |

***Supplementary Table 2:*** *Overview on measured macronutrient concentrations, 𝛿 3He as well as trace element data for all TMRs/CTDs (verticals (V) and tow-yos(T)) conducted at Macauley and Brothers during SO253 (this study), as well as trace metal data from 3 CTD casts conducted during GEOTRACES cruise GP13 (Schlitzer et al., 2018). LOD: Limit of detection, b.d.: below LOD, - : no data.*

|  | **Water Depth** | **NOx** | **SiO2** | **PO4** | **𝛿3He** | **Fe** | **Mn** | **Ni** | **Cu** | **Zn** | **Co** | **Pb** | **Cd** | **La** |
| --- | --- | --- | --- | --- | --- | --- | --- | --- | --- | --- | --- | --- | --- | --- |
|  | **[m]** | **[µM]** | **[µM]** | **[µM]** | **[%]** | **[nM]** | **[nM]** | **[nM]** | **[nM]** | **[nM]** | **[nM]** | **[nM]** | **[nM]** | **[nM]** |
|  |  |  |  |  |  |  |  |  |  |  |  |  |  |  |
| **Blank (n=20)** | - | - | - | - | - | 0.058 | 0.031 | 0.036 | 0.018 | 0.025 | 0.004 | 0.0001 | 0.003 | 0.00007 |
| **Standard deviation** | - | - | - | - | - | 0.006 | 0.004 | 0.008 | 0.003 | 0.015 | 0.001 | 0.0001 | 0.001 | 0.00001 |
| **LOD** | - | 0.320 | 0.100 | 0.040 | - | 0.018 | 0.012 | 0.024 | 0.008 | 0.044 | 0.001 | 0.0002 | 0.002 | 0.00002 |
| **CASS-6** (ref. value) | - | - | - | - | - | 27.9 | 39.7 | 7.12 | 8.34 | 19.4 | 1.14 | 0.051 | 0.193 | - |
| **CASS-6** (this study) | - | - | - | - | - | 29.0 | 41.4 | 7.67 | 8.92 | 20.0 | 1.16 | 0.051 | 0.216 | 0.069 |
|  |  |  |  |  |  |  |  |  |  |  |  |  |  |  |
| **Macauley** |  |  |  |  |  |  |  |  |  |  |  |  |  |  |
| SO253_004_CTD-T_01 | 248 | 7.09 | b.d. | 0.410 | 1.69 | 7.18 | 9.28 | 3.33 | 1.40 | 10.6 | 0.043 | 0.302 | 0.045 | 0.007 |
| SO253_004_CTD-T_03 | 221 | 5.90 | 12.9 | 0.380 | -0.690 | 3.76 | 0.793 | 3.18 | 0.685 | 6.89 | 0.038 | 0.030 | 0.037 | 0.006 |
| SO253_004_CTD-T_05 | 287 | 8.10 | 13.6 | 0.530 | 64.1 | 126 | 379 | 38.3 | 3.14 | 34.7 | 0.424 | 0.610 | 0.200 | 0.028 |
| SO253_004_CTD-T_07 | 360 | 12.0 | b.d. | 0.680 | 1.74 | 5.97 | 1.97 | 3.98 | 1.27 | 11.1 | 0.062 | 0.020 | 0.101 | 0.009 |
| SO253_004_CTD-T_09 | 250 | 7.00 | b.d. | 0.460 | - | 3.76 | 0.940 | 3.61 | 1.10 | 19.1 | 0.054 | 0.544 | 0.058 | 0.007 |
| SO253_004_CTD-T_11 | 207 | 5.71 | b.d. | 0.370 | - | 5.84 | 0.687 | 2.95 | 4.18 | 23.8 | 0.070 | 0.026 | 0.044 | 0.006 |
| SO253_004_CTD-T_13 | 687 | 23.4 | 10.1 | 1.44 | 16.0 | 11.2 | 26.6 | 4.93 | 0.666 | 8.54 | 0.051 | 0.018 | 0.304 | 0.012 |
| SO253_004_CTD-T_15 | 338 | 36.4 | 96.1 | 2.58 | - | 7.95 | 0.798 | 3.62 | 4.88 | 19.8 | 0.086 | 0.022 | 0.108 | 0.014 |
| SO253_004_CTD-T_17 | 250 | 16.0 | 4.29 | 1.06 | - | 0.781 | 0.509 | 2.92 | 0.519 | 1.53 | 0.028 | 0.011 | 0.057 | 0.006 |
| SO253_004_CTD-T_19 | 202 | 9.65 | 2.54 | 0.670 | - | 7.74 | 0.670 | 4.93 | 6.03 | 12.5 | 0.129 | 0.039 | 0.045 | 0.012 |
| SO253_004_CTD-T_21 | 272 | 3.09 | b.d. | b.d. | - | 0.702 | 0.461 | 2.98 | 0.544 | 2.15 | 0.025 | 0.013 | 0.061 | 0.007 |
|  |  |  |  |  |  |  |  |  |  |  |  |  |  |  |
| SO253_006_CTD-V_03 | 319 | 8.42 | 12.9 | 0.610 | 120 | 903 | 954 | 534 | 141 | 105 | 94.1 | 2.67 | 0.488 | 0.102 |
| SO253_006_CTD-V_06 | 302 | 7.85 | 15.0 | 0.700 | 145 | 1197 | 1071 | 621 | 163 | 153 | 105 | 2.98 | 0.921 | 0.165 |
| SO253_006_CTD-V_09 | 288 | 7.44 | 13.6 | 0.640 | 119 | 788 | 813 | 414 | 112 | 106 | 72.4 | 2.13 | 0.562 | 0.086 |
| SO253_006_CTD-V_10 | 261 | 6.02 | b.d. | 0.430 | -0.676 | 11.9 | 1.89 | 2.73 | 0.538 | 11.0 | 0.032 | 0.032 | 0.047 | 0.006 |
| SO253_006_CTD-V_12 | 232 | 5.17 | b.d. | 0.310 | 0.068 | 4.65 | 0.873 | 3.54 | 1.20 | 22.0 | 0.034 | 0.045 | 0.035 | 0.007 |
| SO253_006_CTD-V_14 | 202 | 4.70 | b.d. | 0.310 | - | 2.11 | 0.717 | 2.54 | 0.581 | 13.6 | 0.024 | 0.021 | 0.026 | 0.005 |
| SO253_006_CTD-V_16 | 152 | 3.55 | b.d. | 0.180 | -1.15 | 5.44 | 1.03 | 2.68 | 1.30 | 34.2 | 0.029 | 0.026 | 0.023 | 0.005 |
| SO253_006_CTD-V_18 | 102 | b.d. | b.d. | b.d. | - | 7.13 | 1.10 | 2.63 | 1.08 | 34.6 | 0.039 | 0.030 | 0.008 | 0.005 |
| SO253_006_CTD-V_19 | 77 | b.d. | b.d. | b.d. | 2.92 | 5.35 | 1.13 | 2.36 | 1.09 | 7.00 | 0.024 | 0.016 | 0.007 | 0.003 |
| SO253_006_CTD-V_22 | 12 | b.d. | b.d. | b.d. | -0.566 | 3.00 | 1.07 | 2.29 | 1.41 | 12.10 | 0.014 | 0.020 | 0.003 | 0.004 |
|  |  |  |  |  |  |  |  |  |  |  |  |  |  |  |
| SO253_010_CTD_T_01 | 253 | 6.96 | b.d. | 0.475 | - | 9.55 | 8.25 | 4.59 | 0.62 | 16.9 | 0.355 | 0.033 | 0.050 | 0.007 |
| SO253_010_CTD_T_03 | 275 | 7.39 | 3.65 | 0.598 | - | 22.2 | 88.9 | 4.53 | 0.48 | 5.58 | 0.390 | 0.016 | 0.029 | 0.014 |
| SO253_010_CTD_T_10 | 195 | 5.48 | b.d. | 0.324 | - | 6.06 | 1.90 | 3.15 | 0.74 | 16.3 | 0.121 | 0.022 | 0.034 | 0.009 |
| SO253_010_CTD_T_11 | 264 | 6.81 | b.d. | 0.471 | - | 5.48 | 4.62 | 3.16 | 0.48 | 4.38 | 0.153 | 0.017 | 0.053 | 0.005 |
| SO253_010_CTD_T_15 | 351 | 12.9 | 4.10 | 0.874 | - | 8.16 | 2.95 | 3.91 | 0.71 | 10.7 | 0.127 | 0.018 | 0.135 | 0.010 |
| SO253_010_CTD_T_16 | 274 | 8.49 | b.d. | 0.506 | - | 12.8 | 2.07 | 4.83 | 0.46 | 9.17 | 0.649 | 0.017 | 0.063 | 0.006 |
| SO253_010_CTD_T_20 | 282 | 8.10 | b.d. | 0.544 | - | 12.5 | 0.85 | 4.76 | 0.24 | 10.4 | 0.706 | 0.031 | 0.087 | 0.006 |
|  |  |  |  |  |  |  |  |  |  |  |  |  |  |  |
| SO253_012_CTD-V_03 | 715 | 22.9 | 9.37 | 1.47 | 5.13 | 10.8 | 6.52 | 6.37 | 1.03 | 17.3 | 0.469 | 0.075 | 0.306 | 0.009 |
| SO253_012_CTD-V_08 | 642 | 22.4 | 9.04 | 1.45 | 9.76 | 11.7 | 8.19 | 5.63 | 0.942 | 14.3 | 0.298 | 0.024 | 0.317 | 0.011 |
| SO253_012_CTD-V_14 | 552 | 20.8 | 7.69 | 1.32 | 8.99 | 9.85 | 7.22 | 4.34 | 0.879 | 10.7 | 0.048 | 0.033 | 0.279 | 0.010 |
| SO253_012_CTD-V_16 | 277 | 7.01 | b.d. | 0.517 | 0.700 | 6.9 | 0.603 | 3.88 | 0.671 | 15.9 | 0.270 | 0.046 | 0.069 | 0.005 |
| SO253_012_CTD-V_18 | 102 | b.d. | b.d. | b.d. | -1.86 | 1.13 | 0.815 | 2.19 | 0.354 | 2.39 | 0.013 | 0.022 | 0.005 | 0.003 |
| SO253_012_CTD-V_20 | 51 | b.d. | b.d. | b.d. | - | 2.58 | 0.939 | 2.11 | 0.394 | 2.44 | 0.008 | 0.018 | 0.011 | 0.002 |
| SO253_012_CTD-V_22 | 12 | b.d. | b.d. | b.d. | - | 2.86 | 1.01 | 2.14 | 0.419 | 5.41 | 0.006 | 0.034 | 0.005 | 0.003 |
|  |  |  |  |  |  |  |  |  |  |  |  |  |  |  |
| SO253_019_CTD-V_02 | 352 | 8.08 | b.d. | 0.656 | - | 3.94 | 1.90 | 3.28 | 0.73 | 18.3 | 0.037 | 0.034 | 0.080 | 0.017 |
| SO253_019_CTD-V_08 | 330 | 7.66 | b.d. | 0.615 | - | 32.2 | 4.82 | 3.61 | 1.14 | 20.8 | 0.049 | 0.034 | 0.075 | 0.007 |
| SO253_019_CTD-V_15 | 276 | 12.0 | b.d. | 0.482 | - | 4.9 | 0.752 | 3.64 | 0.892 | 26.6 | 0.134 | 0.044 | 0.043 | 0.008 |
| SO253_019_CTD-V_21 | 51 | b.d. | b.d. | b.d. | - | 1.75 | 0.938 | 2.37 | 0.471 | 13.1 | 0.020 | 0.023 | 0.007 | 0.004 |
| SO253_019_CTD-V_22 | 13 | b.d. | b.d. | b.d. | - | 3.30 | 0.929 | 2.21 | 0.427 | 10.0 | 0.008 | 0.049 | 0.006 | 0.003 |
|  |  |  |  |  |  |  |  |  |  |  |  |  |  |  |
| **Brothers** |  |  |  |  |  |  |  |  |  |  |  |  |  |  |
| SO253_046_CTD-T_04 | 1576 | 31.5 | 78.2 | 2.10 | 64.2 | 49.0 | 102 | 8.63 | 1.77 | 23.7 | 0.141 | 0.040 | 0.695 | 0.015 |
| SO253_046_CTD-T_06 | 1584 | 32.1 | 75.3 | 2.24 | 29.2 | 12.0 | 30.9 | 7.68 | 2.49 | 12.3 | 0.062 | 0.028 | 0.711 | 0.019 |
| SO253_046_CTD-T_08 | 1278 | 30.3 | 38.9 | 2.01 | - | 81.3 | 11.3 | 9.43 | 1.56 | 9.96 | 0.792 | 0.004 | 0.625 | 0.016 |
| SO253_046_CTD-T_10 | 1253 | 28.5 | 38.1 | 2.06 | 26.5 | 77.0 | 173 | 18.6 | 3.06 | 19.3 | 2.69 | 0.015 | 0.204 | 0.017 |
| SO253_046_CTD-T_14 | 1530 | 32.7 | 70.3 | 2.20 | - | 6.42 | 8.94 | 6.97 | 2.04 | 9.51 | 0.045 | 0.015 | 0.676 | 0.019 |
| SO253_046_CTD-T_20 | 1245 | 29.3 | 39.6 | 2.05 | - | 2.18 | 1.69 | 6.20 | 1.31 | 4.06 | 0.045 | 0.012 | 0.597 | 0.016 |
|  |  |  |  |  |  |  |  |  |  |  |  |  |  |  |
| SO253_049_CTD-T_01 | 1334 | 31.9 | 51.6 | 2.20 | - | 5.98 | 30.4 | 8.32 | 1.42 | 11.4 | 0.170 | 0.013 | 0.656 | 0.017 |
| SO253_049_CTD-T_03 | 1496 | 31.4 | 74.4 | 2.24 | - | 9.61 | 8.81 | 7.65 | 2.04 | 15.6 | 0.055 | 0.026 | 0.699 | 0.020 |
| SO253_049_CTD-T_05 | 1220 | 28.1 | 38.0 | 2.06 | - | 20.6 | 51.1 | 6.83 | 1.26 | 12.3 | 0.100 | 0.021 | 0.442 | 0.018 |
| SO253_049_CTD-T_07 | 1538 | 31.3 | 72.4 | 2.28 | - | 15.3 | 32.9 | 7.87 | 2.16 | 15.3 | 0.072 | 0.032 | 0.713 | 0.018 |
| SO253_049_CTD-T_09 | 1306 | 30.8 | 49.8 | 2.18 | - | 11.7 | 59.3 | 6.84 | 1.36 | 14.5 | 0.056 | 0.020 | 0.625 | 0.020 |
| SO253_049_CTD-T_11 | 1281 | 29.7 | 46.2 | 2.13 | - | 25.1 | 257 | 5.88 | - | 15.5 | - | - | 0.399 | 0.014 |
| SO253_049_CTD-T_13 | 1266 | 31.5 | 44.0 | 2.19 | - | 62.6 | 114 | 5.34 | 0.178 | 16.4 | 0.107 | - | 0.444 | 0.023 |
| SO253_049_CTD-T_15 | 1309 | 29.6 | 42.4 | 2.06 | - | 18.8 | 511 | 0.01 | - | 18.1 | - | - | 0.698 | 0.022 |
| SO253_049_CTD-T_17 | 1557 | 5.49 | 2.36 | 0.530 | - | 1.73 | 0.717 | 2.96 | 0.602 | 11.7 | 0.031 | 0.021 | 0.052 | 0.008 |
| SO253_049_CTD-T_21 | 1260 | 28.8 | 43.2 | 2.04 | - | 4.01 | 2.59 | 6.30 | 1.61 | 12.4 | 0.045 | 0.019 | 0.601 | 0.017 |
|  |  |  |  |  |  |  |  |  |  |  |  |  |  |  |
| SO253_053_CTD-V_02 | 1604 | 35.1 | 78.6 | 2.10 | - | 233 | 158 | 7.19 | - | 36.5 | - | - | 0.858 | 0.015 |
| SO253_053_CTD-V_04 | 1549 | 34.9 | 77.6 | 2.01 | 84.8 | 71.3 | 130 | 6.85 | 1.12 | 21.8 | 0.130 | 0.019 | 0.629 | 0.012 |
| SO253_053_CTD-V_10 | 1478 | 37.0 | 69.7 | 2.09 | 44.0 | 31.0 | 43.1 | 3.60 | - | 14.6 | - | 0.008 | 0.748 | 0.017 |
| SO253_053_CTD-V_12 | 1400 | 34.3 | 64.1 | 2.20 | 13.9 | 3.77 | 2.06 | 3.45 | 1.05 | 5.67 | 0.033 | 0.019 | 0.175 | 0.005 |
| SO253_053_CTD-V_13 | 1323 | 33.7 | 55.8 | 2.16 | 12.8 | 6.75 | 4.96 | 6.73 | 1.67 | 11.5 | 0.045 | 0.012 | 0.653 | 0.017 |
| SO253_053_CTD-V_14 | 1000 | 25.3 | 12.7 | 1.60 | -0.410 | 2.03 | 0.487 | 5.06 | 0.818 | 7.15 | 0.046 | 0.013 | 0.385 | 0.012 |
| SO253_053_CTD-V_15 | 750 | 21.3 | 7.58 | 1.32 | 1.00 | 2.68 | 3.59 | 4.40 | 0.726 | 8.42 | 0.040 | 0.012 | 0.271 | 0.010 |
| SO253_053_CTD-V_16 | 500 | 11.9 | 3.89 | 0.835 | -0.990 | 1.51 | 0.383 | 3.35 | 0.576 | 6.55 | 0.035 | 0.011 | 0.115 | 0.010 |
| SO253_053_CTD-V_17 | 250 | 5.27 | b.d. | 0.366 | -1.91 | 2.28 | 0.726 | 2.72 | 0.522 | 11.5 | 0.024 | 0.012 | 0.039 | 0.006 |
| SO253_053_CTD-V_18 | 100 | b.d. | b.d. | b.d. | - | 3.40 | 0.816 | 2.28 | 0.438 | 10.3 | 0.018 | 0.019 | 0.008 | 0.005 |
| SO253_053_CTD-V_19 | 75 | b.d. | b.d. | b.d. | - | 2.03 | 0.782 | 2.28 | 0.440 | 13.8 | 0.013 | 0.011 | 0.010 | 0.003 |
| SO253_053_CTD-V_20 | 59 | b.d. | b.d. | b.d. | - | 0.899 | 0.697 | 2.26 | 0.396 | 3.17 | 0.008 | 0.010 | 0.005 | 0.003 |
| SO253_053_CTD-V_21 | 25 | b.d. | b.d. | b.d. | - | 2.51 | 0.748 | 2.27 | 0.493 | 8.23 | 0.010 | 0.021 | 0.008 | 0.007 |
| SO253_053_CTD-V_22 | 10 | b.d. | b.d. | b.d. | - | 3.42 | 0.819 | 2.29 | 0.502 | 17.1 | 0.009 | 0.020 | 0.012 | 0.005 |
|  |  |  |  |  |  |  |  |  |  |  |  |  |  |  |
| SO253_054_CTD-V_02 | 1750 | 35.0 | 77.8 | 2.20 | - | 15.5 | 25.2 | 7.52 | 2.43 | 14.8 | 0.060 | 0.027 | 0.709 | 0.020 |
| SO253_054_CTD-V_06 | 1560 | 35.0 | 77.0 | 2.15 | - | 34.6 | 58.8 | 8.40 | 2.58 | 46.1 | 0.214 | 0.414 | 0.843 | 0.016 |
| SO253_054_CTD-V_10 | 1440 | 34.7 | 69.8 | 2.18 | - | 12.7 | 16.6 | 7.25 | 2.07 | 10.9 | 0.057 | 0.029 | 0.742 | 0.018 |
| SO253_054_CTD-V_14 | 1370 | 34.3 | 63.1 | 2.18 | - | 6.8 | 4.36 | 7.53 | 1.66 | 11.3 | 0.138 | 0.063 | 0.712 | 0.020 |
| SO253_054_CTD-V_18 | 1229 | 32.3 | 43.9 | 2.08 | - | 22.2 | 18.3 | 6.49 | 0.977 | 6.27 | 0.159 | 0.008 | 0.585 | 0.016 |
| SO253_054_CTD-V_19 | 998 | 25.4 | 13.8 | 1.70 | - | 13.96 | 0.540 | 5.18 | 0.834 | 2.03 | 0.049 | 0.022 | 0.397 | 0.012 |
| SO253_054_CTD-V_21 | 500 | 11.0 | 3.63 | 0.781 | - | 1.17 | 0.426 | 3.30 | 0.534 | 1.74 | 0.036 | 0.010 | 0.104 | 0.010 |
|  |  |  |  |  |  |  |  |  |  |  |  |  |  |  |
| SO253_057_CTD-T_02 | 1286 | 32.3 | 43.8 | 2.07 | - | 10.3 | 12.4 | 6.82 | 1.48 | 7.76 | 0.058 | 0.012 | 0.592 | 0.016 |
| SO253_057_CTD-T_04 | 1344 | 33.1 | 51.4 | 2.20 | - | 10.6 | 30.5 | 6.75 | 1.48 | 10.2 | 0.090 | 0.033 | 0.623 | 0.022 |
| SO253_057_CTD-T_06 | 1515 | 34.5 | 69.9 | 2.27 | - | 14.3 | 10.6 | 7.30 | 1.85 | 12.3 | 0.057 | 0.015 | 0.670 | 0.019 |
| SO253_057_CTD-T_08 | 1441 | 33.9 | 65.5 | 2.28 | 15.3 | 6.04 | 4.83 | 7.10 | 1.81 | 13.8 | 0.044 | 0.011 | 0.685 | 0.018 |
| SO253_057_CTD-T_10 | 1338 | 32.9 | 52.2 | 2.22 | 39.7 | 9.52 | 105 | 6.15 | 0.770 | 13.5 | 0.031 | - | 0.557 | 0.017 |
| SO253_057_CTD-T_12 | 1275 | 31.8 | 42.3 | 2.06 | 10.2 | 6.01 | 8.15 | 6.41 | 1.28 | 11.2 | 0.065 | 0.013 | 0.591 | 0.016 |
| SO253_057_CTD-T_14 | 1556 | 34.7 | 76.2 | 2.22 | - | 57.3 | 95.3 | 8.02 | 1.17 | 25.8 | 0.093 | 0.032 | 0.558 | 0.015 |
| SO253_057_CTD-T_16 | 1277 | 32.1 | 48.6 | 2.22 | 56.1 | 18.8 | 409 | 6.08 | 0.100 | 12.4 | 0.149 | 0.012 | 0.713 | 0.021 |
| SO253_057_CTD-T_18 | 1518 | 35.0 | 77.2 | 2.27 | - | 13.2 | 30.9 | 7.27 | 2.09 | 10.8 | 0.037 | 0.038 | 0.694 | 0.019 |
| SO253_057_CTD-T_20 | 1495 | 35.1 | 80.4 | 2.34 | - | 6.06 | 5.42 | 7.54 | 2.16 | 9.71 | 0.045 | 0.022 | 0.715 | 0.021 |
|  |  |  |  |  |  |  |  |  |  |  |  |  |  |  |
| SO253_058_CTD-V_02 | 1376 | 33.7 | 62.1 | 2.32 | -1.78 | 6.76 | 7.04 | 7.01 | 1.77 | 12.3 | 0.047 | 0.011 | 0.668 | 0.018 |
| SO253_058_CTD-V_04 | 1229 | 30.1 | 37.6 | 2.09 | 20.9 | 25.1 | 59.9 | 6.20 | 1.00 | 8.05 | 0.062 | 0.005 | 0.377 | 0.017 |
| SO253_058_CTD-V_10 | 1154 | 29.8 | 31.2 | 1.93 | - | 1.99 | 1.23 | 5.84 | 1.13 | 12.3 | 0.051 | 0.010 | 0.532 | 0.014 |
| SO253_058_CTD-V_14 | 500 | 11.7 | 3.79 | 0.786 | - | 1.97 | 0.412 | 3.50 | 0.575 | 12.0 | 0.040 | 0.012 | 0.114 | 0.010 |
| SO253_058_CTD-V_18 | 100 | b.d. | b.d. | 0.155 | - | 1.79 | 0.797 | 2.49 | 0.376 | 7.59 | 0.021 | 0.013 | 0.011 | 0.005 |
|  |  |  |  |  |  |  |  |  |  |  |  |  |  |  |
| SO253_060_TMR_01 | 1700 | 34.5 | 87.2 | 2.37 | - | 3.64 | 2.97 | 7.79 | 2.48 | 9.01 | 0.036 | 0.011 | 0.730 | 0.022 |
| SO253_060_TMR_02 | 1600 | 35.0 | 75.1 | 2.37 | - | 5.81 | 5.82 | 7.23 | 2.00 | 8.33 | 0.040 | 0.016 | 0.694 | 0.020 |
| SO253_060_TMR_03 | 1540 | 34.6 | 71.3 | 2.41 | - | 25.5 | 11.9 | 7.20 | 1.97 | 10.0 | 0.046 | 0.031 | 0.695 | 0.018 |
| SO253_060_TMR_04 | 1440 | 33.9 | 61.3 | 2.34 | - | 11.4 | 10.3 | 6.95 | 1.72 | 8.28 | 0.045 | 0.014 | 0.658 | 0.018 |
| SO253_060_TMR_05 | 1300 | 32.7 | 48.9 | 2.31 | - | 7.49 | 10.9 | 6.57 | 1.83 | 6.94 | 0.043 | 0.019 | 0.621 | 0.016 |
| SO253_060_TMR_06 | 1200 | 30.1 | 32.2 | 2.03 | - | 2.20 | 1.02 | 5.86 | 1.22 | 7.37 | 0.044 | 0.013 | 0.543 | 0.015 |
| SO253_060_TMR_07 | 1100 | - | - | - | - | 2.23 | 0.532 | 5.45 | 1.03 | 5.56 | 0.044 | - | 0.495 | 0.013 |
| SO253_060_TMR_08 | 1000 | 25.4 | 14.4 | 1.66 | - | 1.62 | 0.435 | 5.18 | 0.847 | 3.68 | 0.045 | 0.018 | 0.403 | 0.012 |
| SO253_060_TMR_09 | 750 | 21.0 | 8.18 | 1.39 | - | 2.44 | 2.88 | 4.49 | 0.710 | 3.28 | 0.043 | 0.013 | 0.282 | 0.011 |
| SO253_060_TMR_10 | 500 | 12.5 | 4.02 | 0.855 | - | 1.22 | 0.367 | 3.53 | 0.713 | 2.72 | 0.038 | 0.041 | 0.129 | 0.010 |
| SO253_060_TMR_11 | 250 | 6.84 | b.d. | 0.449 | - | 1.48 | 0.793 | 2.88 | 0.560 | 3.31 | 0.027 | 0.025 | 0.043 | 0.006 |
|  |  |  |  |  |  |  |  |  |  |  |  |  |  |  |
| SO253_062_CTD-T_02 | 1607 | 35.8 | 85.5 | 2.52 | - | 8.25 | 8.29 | 8.21 | 2.36 | 13.5 | 0.055 | 0.030 | 0.706 | 0.021 |
| SO253_062_CTD-T_04 | 1486 | 35.1 | 73.4 | 2.37 | - | 19.0 | 25.9 | 7.87 | 2.13 | 125 | 0.057 | 0.033 | 0.679 | 0.018 |
| SO253_062_CTD-T_06 | 1328 | 33.7 | 53.1 | 2.33 | - | 7.83 | 11.3 | 7.44 | 1.56 | 96.3 | 0.056 | 0.021 | 0.628 | 0.018 |
| SO253_062_CTD-T_08 | 1562 | 35.0 | 72.9 | 2.46 | - | 16.7 | 14.7 | 8.50 | 2.06 | 98.5 | 0.054 | 0.034 | 0.678 | 0.019 |
| SO253_062_CTD-T_10 | 1441 | 34.6 | 71.4 | 2.44 | - | 14.5 | 15.7 | 7.45 | 1.98 | 18.2 | 0.047 | 0.032 | 0.687 | 0.019 |
| SO253_062_CTD-T_14 | 1524 | 34.7 | 74.9 | 2.44 | - | 10.9 | 11.9 | 7.65 | 2.04 | 11.3 | 0.046 | 0.043 | 0.673 | 0.020 |
| SO253_062_CTD-T_19 | 1404 | 34.5 | 64.6 | 2.46 | - | 5.65 | 2.40 | 7.43 | 1.83 | 21.5 | 0.045 | 0.138 | 0.680 | 0.019 |
|  |  |  |  |  |  |  |  |  |  |  |  |  |  |  |
| SO253_070_TMR_01 | 1700 | 42.3 | 96.2 | 2.46 | - | 8.35 | 3.38 | 8.97 | 3.03 | 17.1 | 0.047 | 0.077 | 0.749 | 0.026 |
| SO253_070_TMR_03 | 1550 | 35.1 | 96.4 | 2.44 | - | 8.55 | 2.09 | 8.32 | 2.31 | 15.7 | 0.050 | 0.049 | 0.703 | 0.022 |
| SO253_070_TMR_04 | 1500 | 35.0 | 92.4 | 2.38 | - | 8.04 | 1.98 | 8.19 | 2.31 | 15.8 | 0.044 | 0.036 | 0.676 | 0.021 |
| SO253_070_TMR_05 | 1450 | 34.4 | 80.2 | 2.28 | - | 9.51 | 2.64 | 8.43 | 2.74 | 18.8 | 0.056 | 0.092 | 0.713 | 0.021 |
| SO253_070_TMR_06 | 1350 | 33.5 | 62.0 | 2.27 | - | 8.37 | 2.71 | 8.17 | 1.71 | 12.1 | 0.063 | 0.018 | 0.644 | 0.019 |
| SO253_070_TMR_07 | 1300 | 33.2 | 54.0 | 2.27 | - | 7.13 | 2.13 | 7.59 | 1.57 | 14.5 | 0.052 | 0.020 | 0.652 | 0.020 |
| SO253_070_TMR_08 | 1250 | 31.9 | 46.2 | 2.19 | - | 6.37 | 1.24 | 7.18 | 1.36 | 8.40 | 0.050 | 0.013 | 0.613 | 0.016 |
| SO253_070_TMR_09 | 1200 | 30.3 | 35.0 | 2.25 | - | 5.47 | 0.750 | 6.72 | 1.18 | 7.46 | 0.051 | 0.015 | 0.533 | 0.015 |
| SO253_070_TMR_10 | 1100 | 28.1 | 24.9 | 1.96 | - | 5.26 | 0.563 | 6.40 | 1.06 | 7.46 | 0.055 | - | 0.487 | 0.013 |
| SO253_070_TMR_11 | 1000 | 25.5 | 16.2 | 1.81 | - | 5.29 | 0.510 | 5.96 | 0.912 | 6.63 | 0.048 | 0.018 | 0.415 | 0.012 |
|  |  |  |  |  |  |  |  |  |  |  |  |  |  |  |
| SO253_083_TMR_01 | 1700 | - | - | - | - | 14.5 | 3.83 | 10.3 | 2.83 | 20.0 | 0.066 | 0.014 | 0.730 | 0.026 |
| SO253_083_TMR_02 | 1600 | 31.9 | 82.1 | 2.40 | 18.0 | 32.0 | 3.42 | 9.90 | 2.46 | 16.1 | 0.056 | 0.016 | 0.767 | 0.023 |
| SO253_083_TMR_03 | 1560 | 29.9 | 77.5 | 2.40 | 16.7 | 12.2 | 3.07 | 9.06 | 2.23 | 15.0 | 0.054 | 0.019 | 0.679 | 0.020 |
| SO253_083_TMR_04 | 1450 | - | - | - | - | 16.2 | 5.72 | 8.72 | 1.80 | 17.6 | 0.056 | 0.021 | 0.663 | 0.019 |
| SO253_083_TMR_05 | 1350 | 28.0 | 47.7 | 2.29 | 16.8 | 11.4 | 1.50 | 8.63 | 1.56 | 11.3 | 0.057 | 0.011 | 0.648 | 0.017 |
| SO253_083_TMR_06 | 1220 | 31.1 | 36.2 | 2.21 | 12.7 | 10.4 | 1.03 | 8.98 | 1.25 | 8.88 | 0.055 | 0.011 | 0.586 | 0.015 |
| SO253_083_TMR_07 | 1000 | 26.9 | 20.3 | - | 8.44 | 9.93 | 0.815 | 7.54 | 1.04 | 8.21 | 0.060 | - | 0.498 | 0.014 |
| SO253_083_TMR_08 | 750 | 22.6 | 9.51 | 1.28 | 3.46 | 9.56 | 0.577 | 6.49 | 0.749 | 6.47 | 0.058 | 0.011 | 0.319 | 0.011 |
| SO253_083_TMR_09 | 250 | 9.20 | - | 0.630 | 3.05 | 8.93 | 0.560 | 4.79 | 0.501 | 6.23 | 0.051 | 0.010 | 0.079 | 0.005 |
| SO253_083_TMR_10 | 77 | b.d. | b.d. | b.d. | 0.820 | 8.51 | 0.837 | 4.06 | 0.462 | 5.81 | 0.024 | 0.010 | 0.012 | 0.003 |
| SO253_083_TMR_11 | 10 | b.d. | b.d. | b.d. | -0.660 | 8.37 | 0.856 | 4.06 | 0.479 | 5.83 | 0.019 | 0.013 | 0.004 | 0.003 |
|  |  |  |  |  |  |  |  |  |  |  |  |  |  |  |
| GP13_Station 28_04 | 298 | - | - | - | - | 0.408 | 0.263 | 2.85 | 0.459 | 0.028 | - | 0.017 | 0.094 | - |
| GP13_Station 28_09 | 1583 | - | - | - | - | 0.922 | 0.468 | 7.00 | 2.89 | 3.41 | - | 0.007 | 0.760 | - |
| GP13_Station 28_10 | 1386 | - | - | - | - | 0.932 | 0.615 | 6.65 | 2.49 | 2.84 | - | 0.025 | 0.740 | - |

***Supplementary Table 3****: ﻿ Apparent plume ages and radium isotope activities for 223Ra and 224Ra of CTD samples at Macauley volcano. All activities are given in dpm/100L. The presented apparent ages in days (d) were calculated according to the hot hydrothermal end member ratio of 013ROV_4F5F. ex = excess activity, AR = activity ratio.*

| **Macauley** | **Water Depth**  **[m]** | **Plume Age**  **[d]** | **223Ra** | **ex224Ra** | **AR 224/223** |
| --- | --- | --- | --- | --- | --- |
| SO253_004_CTD_03 | 221 | 12.5 ± 0.6 | 0.14 ± 0.07 | 0.60 ± 0.24 | 4.5 ± 0.3 |
| SO253_006_CTD_03 | 319 | 2.6 ± 2.4 | 0.24 ± 0.15 | 3.73 ± 0.37 | 15.8 ± 4.8 |
| SO253_006_CTD_06 | 302 | 7.3 ± 1.2 | 0.41 ± 0.20 | 3.56 ± 0.34 | 8.7 ± 1.3 |
| SO253_010_CTD_01 | 253 | 8.2 ± 0.4 | 0.02 ± 0.02 | 0.12 ± 0.26 | 7.7 ± 0.3 |
| SO253_010_CTD_03 | 275 | 4.7 ± 1.3 | 0.06 ± 0.02 | 0.67 ± 0.09 | 12.1 ± 2.0 |
| SO253_010_CTD_11 | 264 | 6.4 ± 0.4 | 0.03 ± 0.03 | 0.34 ± 0.09 | 9.7 ± 0.3 |
| SO253_012_CTD_03 | 715 | 13.8 ± 0.9 | 0.06 ± 0.03 | 0.24 ± 0.07 | 3.8 ± 0.4 |
| SO253_012_CTD_08 | 330 | 18.1 ± 0.9 | 0.11 ± 0.04 | 0.23 ± 0.08 | 2.2 ± 0.3 |
| SO253_019_CTD_08 | 330 | 9.5 ± 0.7 | 0.06 ± 0.04 | 0.40 ± 0.11 | 6.5 ± 0.5 |
| SO253_019_CTD_02 | 352 | 14.8 ± 0.7 | 0.06 ± 0.04 | 0.19 ± 0.10 | 3.3 ± 0.3 |
|  |  |  |  |  |  |
| SO253_013_ROV_4F5F | 335 | 0.0 | 87.14 ± 29.09 | 1930 ± 203 | 22.2 ± 0.7 |
